# Supplementary material for: Hydrothermal Crystallization of Bismuth Oxychlorides (BiOCl) Using Different Shape Control Reagents
Source: MDPI journal article supplement (doi:10.3390/ma14092261), 2021-04-27
Supplement: s1 [file s1]

# Hydrothermal Crystallization of Bismuth Oxychlorides (BiOCl) Using Different Shape Control Reagents

Enikő Bárdos <sup>1,2</sup>, Viktória A. Márta <sup>1</sup>, Szilvia Fodor <sup>1,2</sup>, Endre-Zsolt Kedves <sup>3,4,5</sup> and Klara Hernadi <sup>1,6,\*</sup> and Zsolt Pap <sup>1,2,4,\*</sup>

<sup>1</sup> Department of Applied and Environmental Chemistry, University of Szeged, Rerrich Béla tér 1, HU-6720, Szeged, Hungary; bardosenci@gmail.com (E.B.), martaviktoria95@gmail.com (V.A.M.), fod\_szilvia@hotmail.com (S.F.)

<sup>2</sup> Institute of Environmental Science and Technology, University of Szeged, Tisza Lajos krt. 103, Szeged HU-6720, Hungary

<sup>3</sup> Faculty of Physics, Babeş-Bolyai University, M. Kogălniceanu 1, RO-400084 Cluj-Napoca, Romania; kedves.endre91@gmail.com

<sup>4</sup> Nanostructured Materials and Bio-Nano-Interfaces Center, Institute for Interdisciplinary Research on Bio-Nano-Sciences, Babeş-Bolyai University, Treboniu Laurian 42, RO-400271 Cluj-Napoca, Romania

<sup>5</sup> Department of Biosystems Engineering, Faculty of Engineering, University of Szeged, Moszkvai krt. 9, H-6725 Szeged, Hungary

<sup>6</sup> Institute of Physical Metallurgy, Metal Forming and Nanotechnology, University of Miskolc, 3515 Miskolc-Egyetemváros, Hungary

\* Correspondence: hernadi@chem.u-szeged.hu (K.H.), pzsolt@chem.u-szeged.hu (Z.P.)

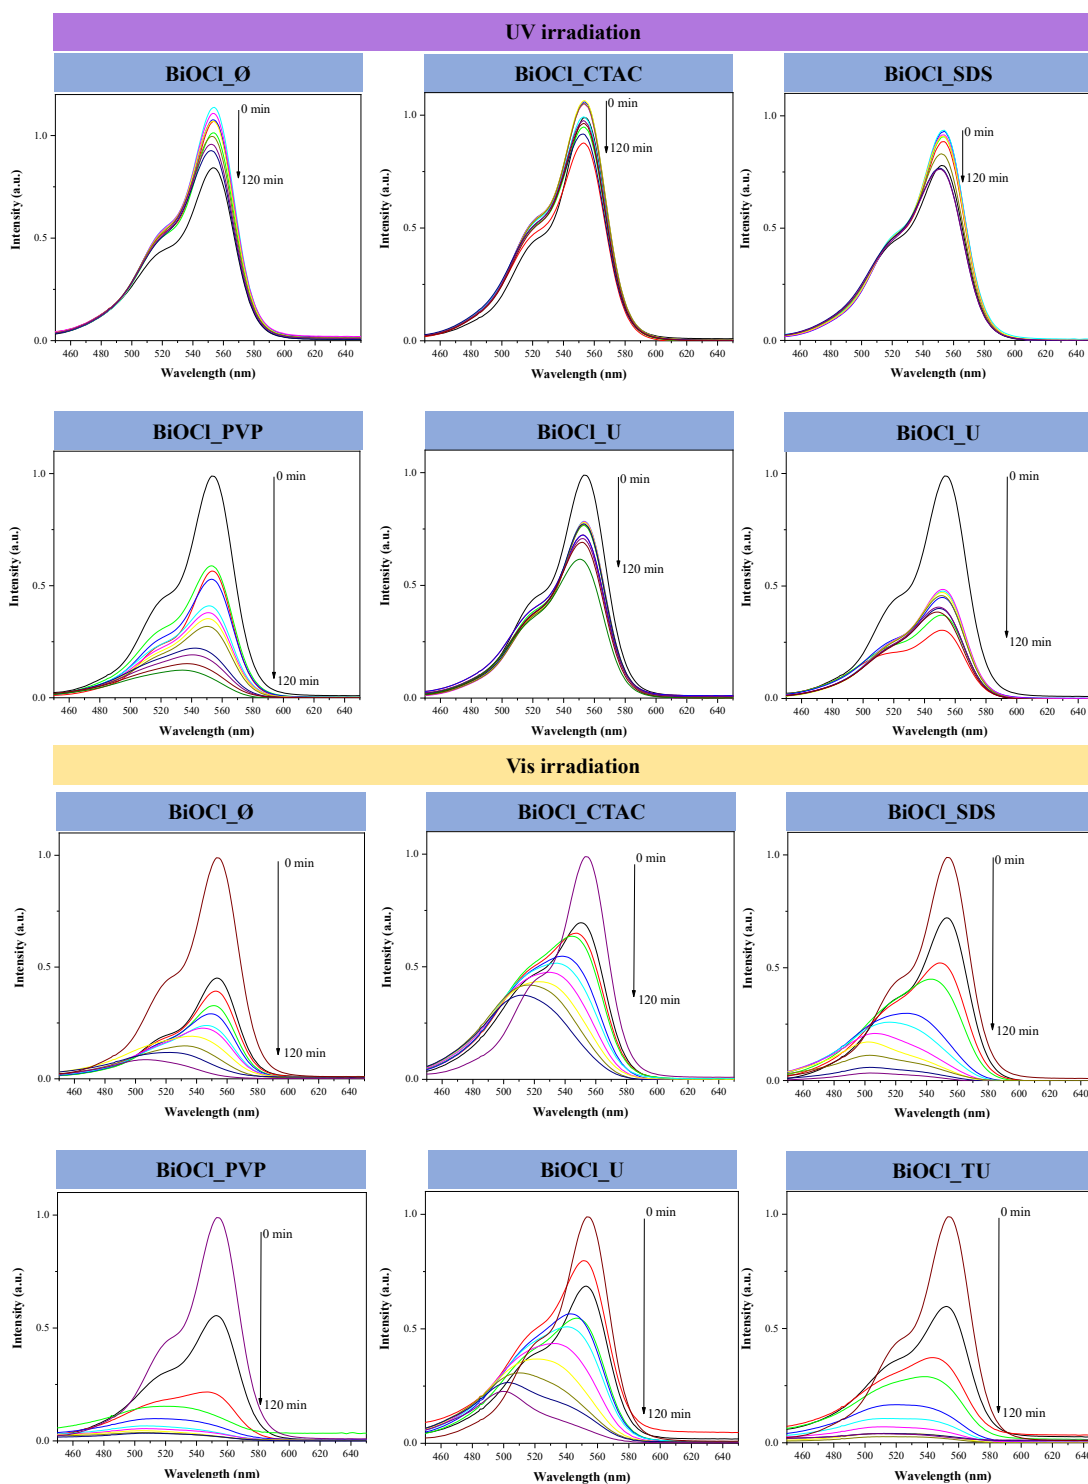

Figure S1. The RhB spectra of the Rhb degradation under UV and Vis irradiation
